# Supplementary material for: Vibrational spectrum and photochemistry of phosphaketene HPCO
Source: Royal Society of Chemistry journal article supplement (doi:10.1039/d1cp02860j), 2021-01-01
Supplement: d1cp02860j1.pdf [file d1cp02860j1.pdf]

## Vibrational Spectrum and Photochemistry of Phosphaketene HPCO

### *Supporting Information*

Weiyu Qian,<sup>a</sup> Bo Lu,<sup>a</sup> Gengwen Tan,<sup>\*b</sup> Guntram Rauhut,<sup>c</sup> Hansjörg Grützmacher,<sup>d</sup> and  
Xiaoqing Zeng<sup>\*a</sup>

<sup>a</sup>Department of Chemistry, Fudan University, 200433 Shanghai, China. E-mail: xqzeng@fudan.edu.cn.

<sup>b</sup>College of Chemistry, Chemical Engineering and Materials Science, Soochow University, 215123 Suzhou, China. E-mail: gwtan@suda.edu.cn

<sup>c</sup>Institute for Theoretical Chemistry, University of Stuttgart, Pfaffenwaldring 55, Stuttgart 70569, Germany.

<sup>d</sup>Laboratorium für Anorganische Chemie, ETH, Zürich 8092, Switzerland.

---

## Table of Content

|                                                                                                                             |     |
|-----------------------------------------------------------------------------------------------------------------------------|-----|
| Computational details.....                                                                                                  | S2  |
| Gas phase IR spectrum of HPCO ( <b>Figure S1</b> ).....                                                                     | S3  |
| IR spectra reflecting the decomposition of gaseous HPCO ( <b>Figure S2</b> ).....                                           | S4  |
| IR difference spectrum showing the changes of DPCO/CO/Ar upon 193 nm laser irradiation ( <b>Figure S3</b> ).....            | S5  |
| The O <sub>2</sub> -oxidation of HPCO in the gas phase ( <b>Figure S4</b> ).....                                            | S6  |
| IR difference spectrum showing the changes of HPCO/O <sub>2</sub> /Ar upon 365 nm LED irradiation ( <b>Figure S5</b> )..... | S7  |
| Expanded IR spectra of Figure 2 ( <b>Figure S6</b> ).....                                                                   | S8  |
| Calculated energy profiles for HNCO/HOCN and HPCO/HOCP ( <b>Figures S7 and S8</b> ).....                                    | S9  |
| Wavefunction analysis results for HPCO, HOCP, and <i>anti</i> -HPNO• ( <b>Figure S9</b> ).....                              | S10 |
| Calculated ESP, NPA, spin densities, and WBI results for <i>syn</i> -HPNO• ( <b>Figure S10</b> ).....                       | S10 |
| Calculated energy profile for HPNO• ( <b>Figure S11</b> ).....                                                              | S11 |
| Calculated structures for HPCO, HOCP, and <i>anti</i> -HPNO ( <b>Figure S12</b> ).....                                      | S11 |
| Calculated IR data for HPCO and DPCO ( <b>Table S1 and S2</b> ).....                                                        | S12 |
| Calculated IR data for HP ( <b>Table S3</b> ).....                                                                          | S14 |
| Calculated IR data for •PCO ( <b>Table S4</b> ).....                                                                        | S14 |
| Calculated IR data for <i>syn</i> -HPNO• ( <b>Table S5</b> ).....                                                           | S14 |
| Calculated IR data for HOCP ( <b>Table S6</b> ).....                                                                        | S15 |
| Computed atomic coordinates and energies for all optimized structures.....                                                  | S16 |
| References.....                                                                                                             | S20 |

**Computational details**

Local minima were confirmed by vibrational frequencies analysis, and transition states were further confirmed by intrinsic reaction coordinate (IRC) calculations.<sup>[1]</sup> The natural population analysis (NPA), natural spin densities, and Wiberg bond indices (WBI) were computed at the CCSD(T)/cc-pVTZ level with the Natural Bond Orbital (NBO) method.<sup>[2]</sup> The structures and harmonic frequencies were performed with ORCA.<sup>[3]</sup> The electrostatic potential maps were performed with Multiwfn<sup>[4]</sup> and Gaussian 09 software,<sup>[5]</sup> respectively.

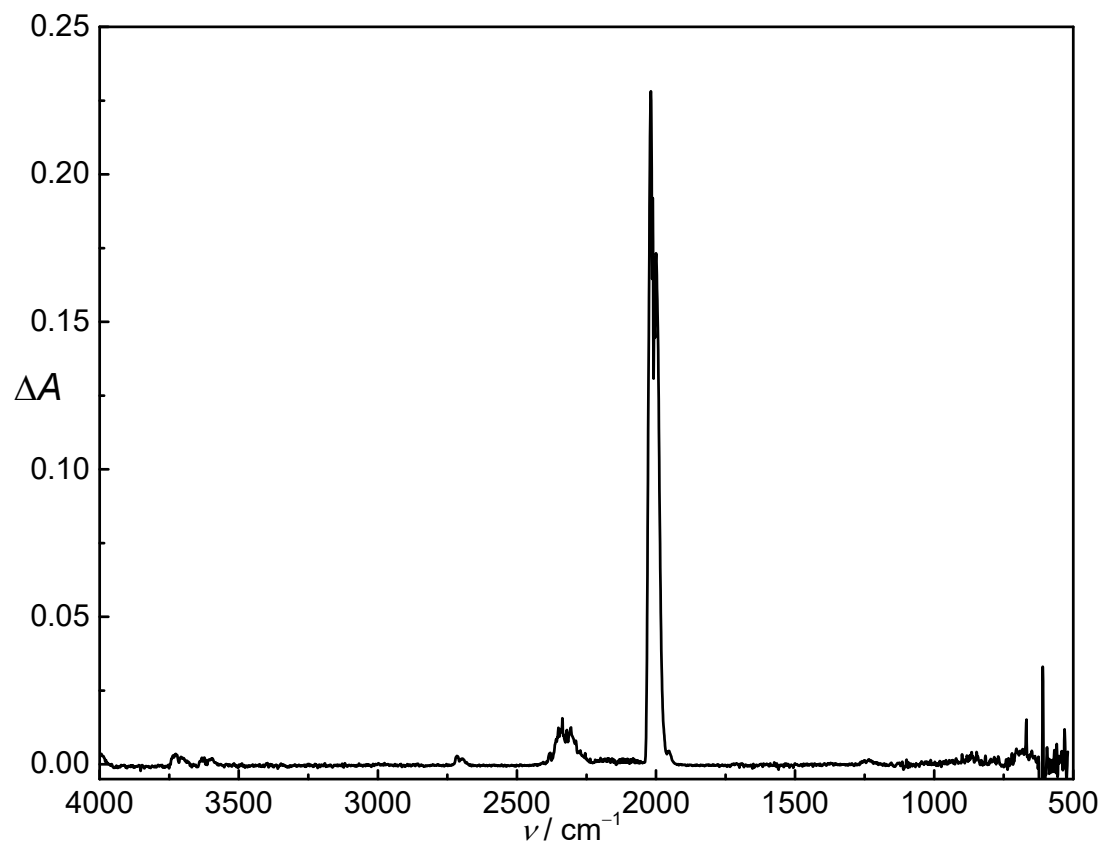

**Figure S1.** Gas phase IR spectrum of HPCO (130 Pa).

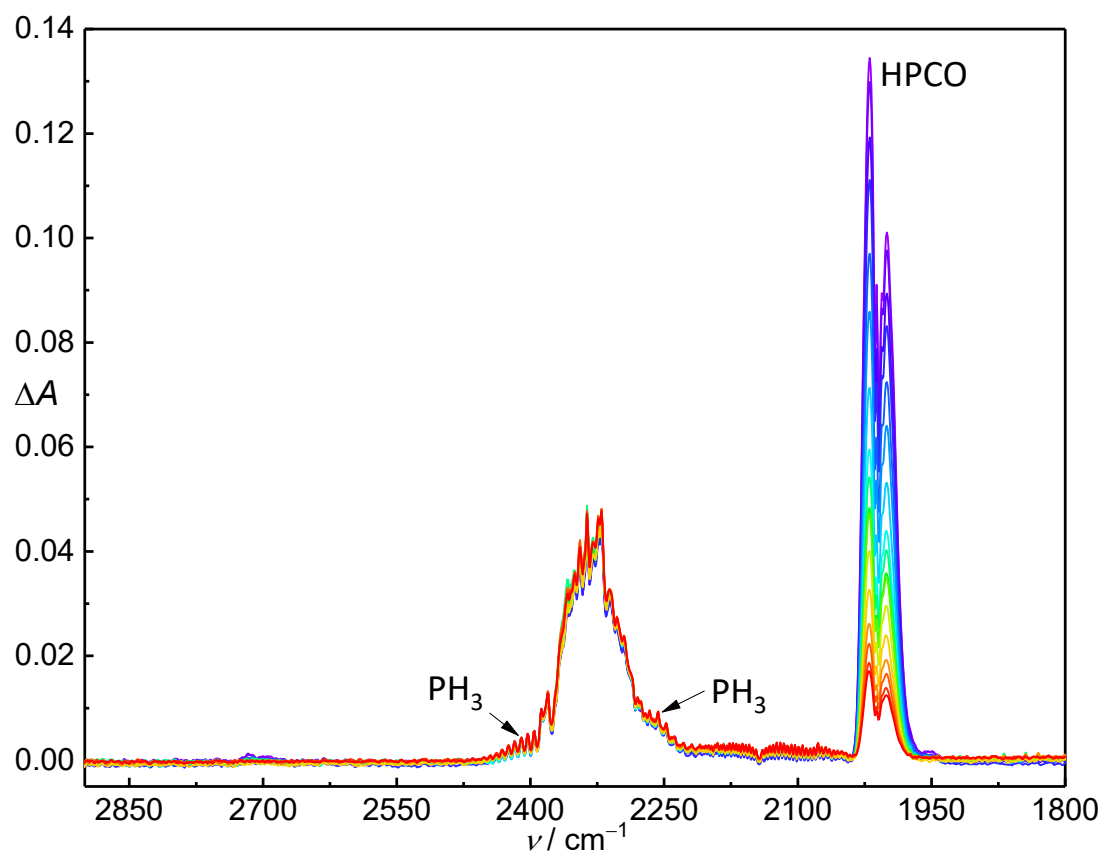

**Figure S2.** IR spectra reflecting the decomposition of HPCO (300.0 Pa) and formation of  $\text{PH}_3$  in the gas phase at 26 °C over a period of 124.5 min.

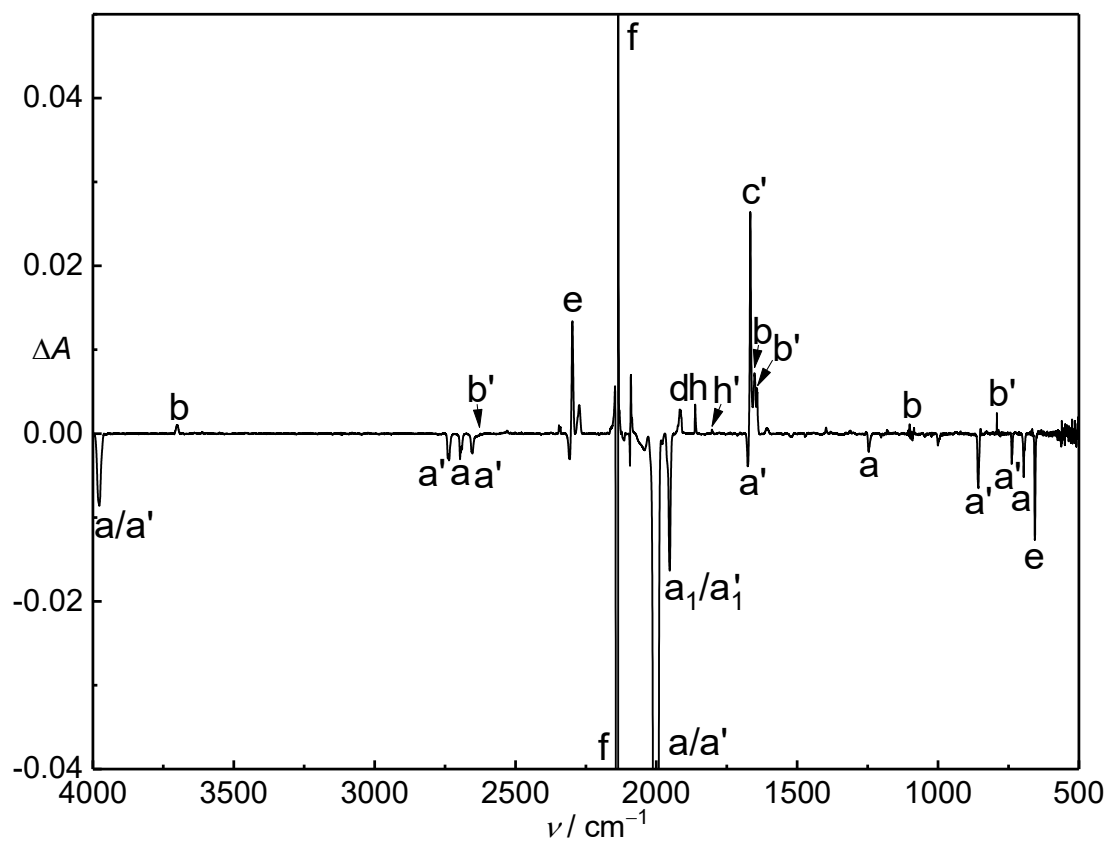

**Figure S3.** IR difference spectrum showing the changes of DPCO/CO/Ar=1:50:1000 upon 193 nm laser irradiation (5.0 min). The bands of HPCO (a),  $\text{HP}^{13}\text{CO}$  ( $a_1$ ),  $\text{DP}^{13}\text{CO}$  ( $a_1'$ ),  $\text{DP}(c')$ , PCO (d),  $\text{CO}_2$  (e), CO (f), HCO (h), and DCO ( $h'$ ) are labeled.

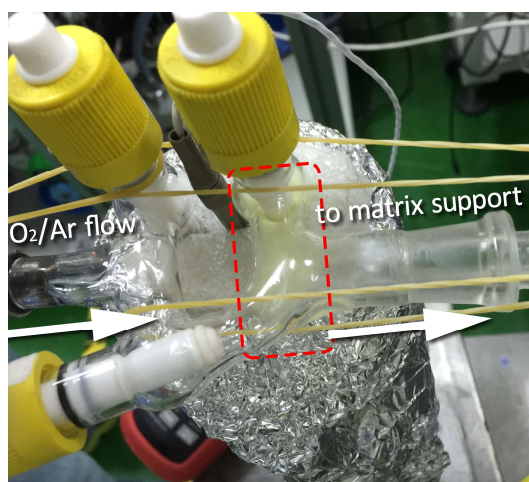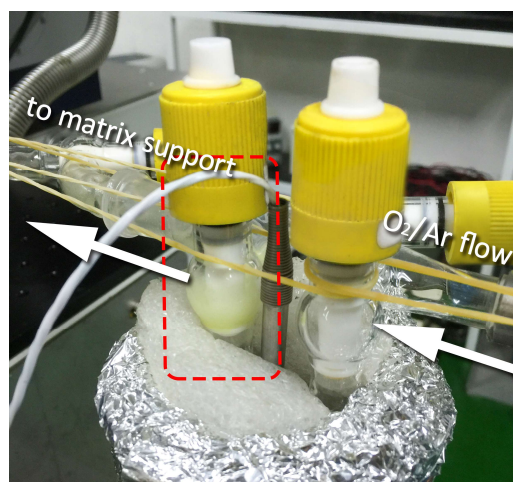

**Figure S4.** The oxidation of the HPCO vapor by passing the O<sub>2</sub>/Ar mixture (3:1000) through the cold trap containing solid HPCO (ca. -139 °C).

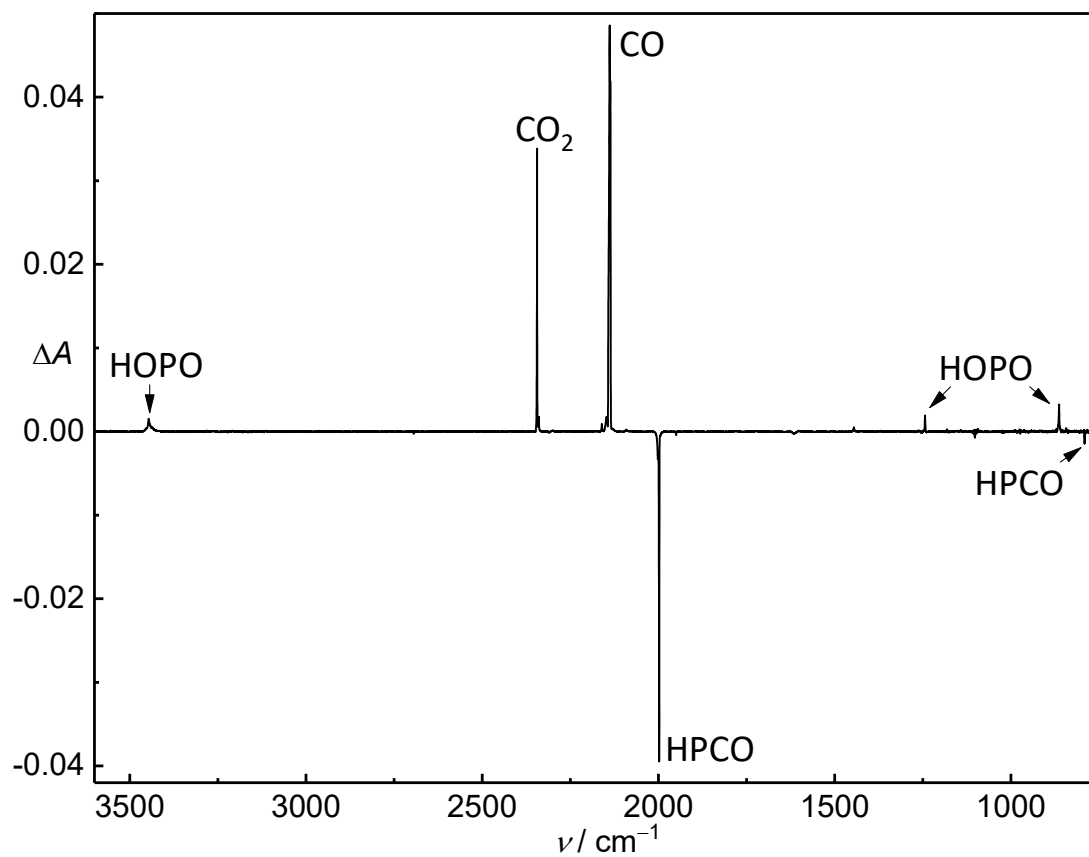

**Figure S5.** IR difference spectrum showing the changes of HPCO/O<sub>2</sub>/Ar=1:3:1000 upon 365 nm LED irradiation (12.0 K, 30.0 min).



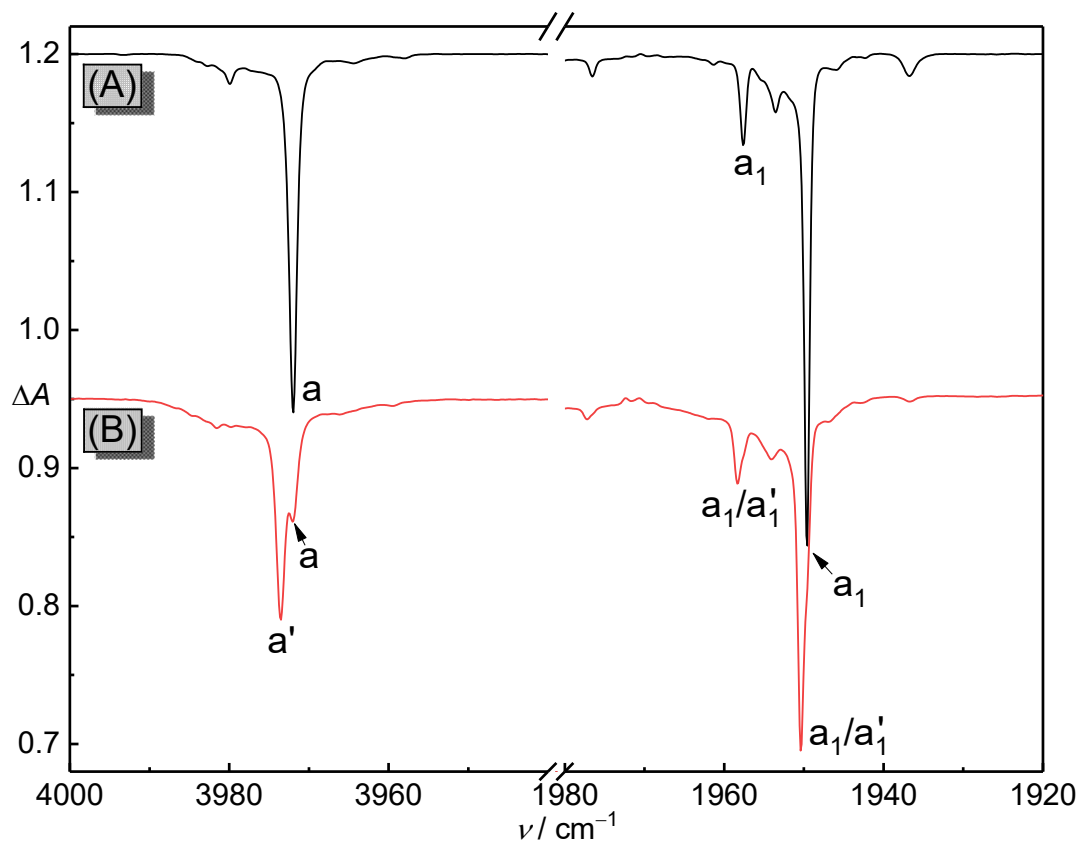

**Figure S6.** A) IR difference spectrum in the ranges of 4000–3940 and 1980–1920  $\text{cm}^{-1}$  showing the depletion of HPCO (a) upon 193 nm laser irradiation (5 mJ, 7.5 min). B) IR difference spectrum in the range of 4000–3940 and 1980–1920  $\text{cm}^{-1}$  showing the depletion of DPCO (a') in Ar-matrix upon 193 nm laser irradiation (5 mJ, 5.5 min). The IR bands of  $\text{HP}^{13}\text{CO}$  (a<sub>1</sub>),  $\text{DP}^{13}\text{CO}$  (a<sub>1</sub>') are also labeled.

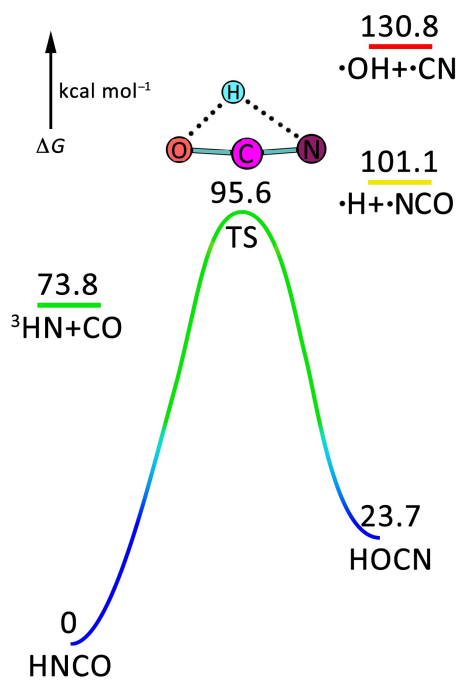

**Figure S7.** Potential energy profile for HNCO/HOCN, and relative energies with ZPE corrections (in kcal mol<sup>-1</sup>) calculated at the CCSD(T)/cc-pVTZ level.

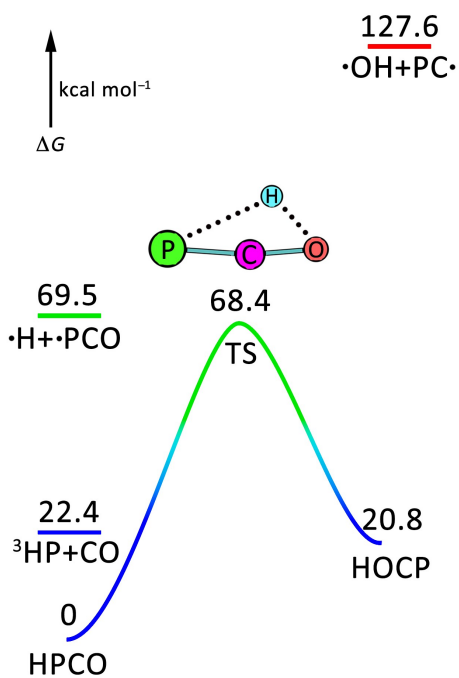

**Figure S8.** Potential energy profile for HPCO/HOCP, and relative energies with ZPE corrections (in kcal mol<sup>-1</sup>) calculated at the CCSD(T)/cc-pVTZ level.

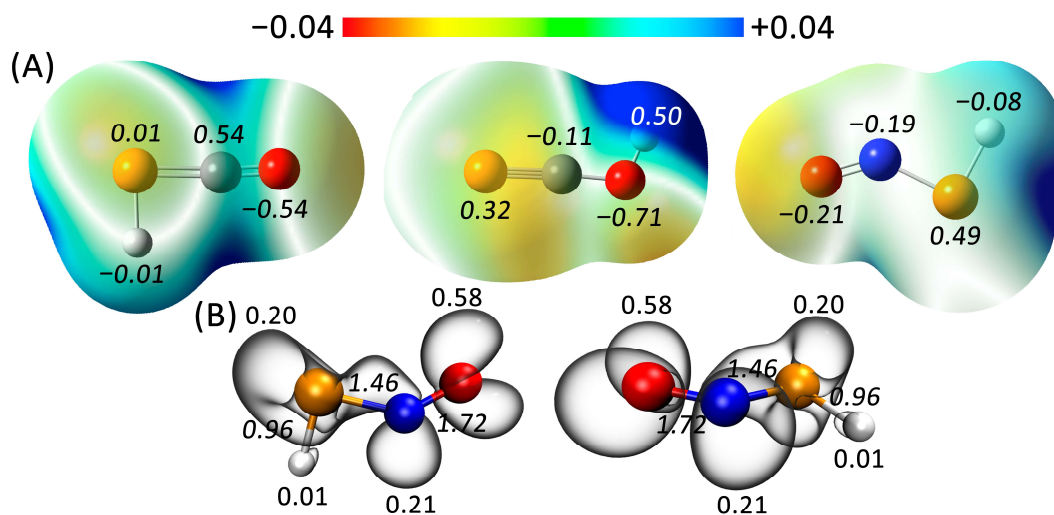

**Figure S9.** A) CCSD(T)/cc-pVTZ calculated molecular electrostatic potential (ESP) maps (isovalue = 0.001) and natural population analysis (NPA) charges (numbers in italics) for HPCO (a, left), HOCP (b, middle), and *anti*-HPNO• (g, right). B) Calculated spin densities and Wiberg bond indices (WBI, numbers in italics) for *anti*-HPNO•.

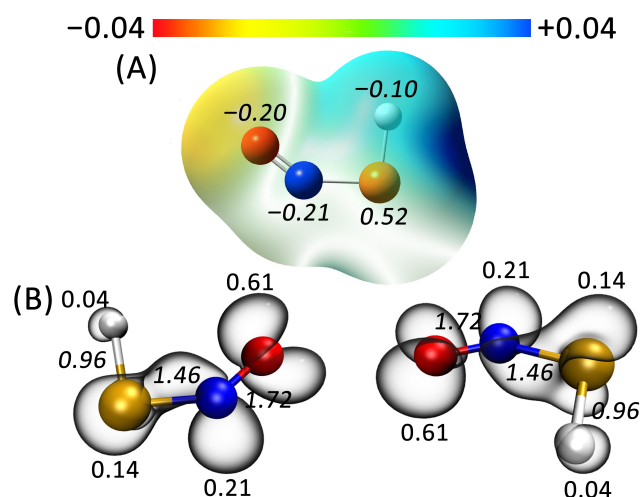

**Figure S10.** A) CCSD(T)/cc-pVTZ calculated molecular electrostatic potential (ESP) maps (isovalue = 0.001) and natural population analysis (NPA) charges (numbers in italics) for *syn*-HPNO•. B) Calculated spin densities and Wiberg bond indices (WBI, numbers in italics) for *syn*-HPNO•.

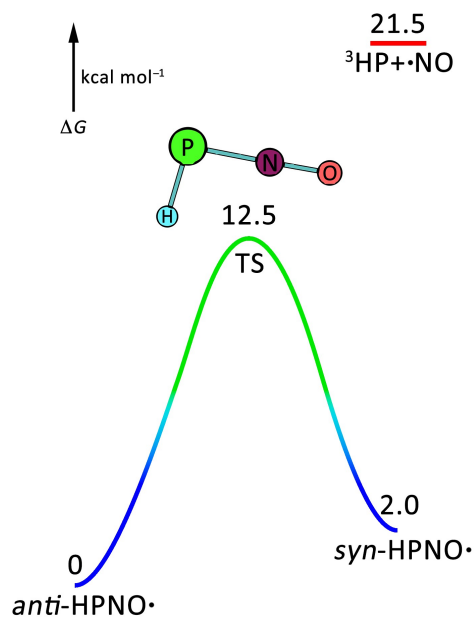

**Figure S11.** Potential energy profile for *anti*-HPNO•, and relative energies with ZPE corrections (in  $\text{kcal mol}^{-1}$ ) calculated at the UCCSD(T)/cc-pVTZ level.

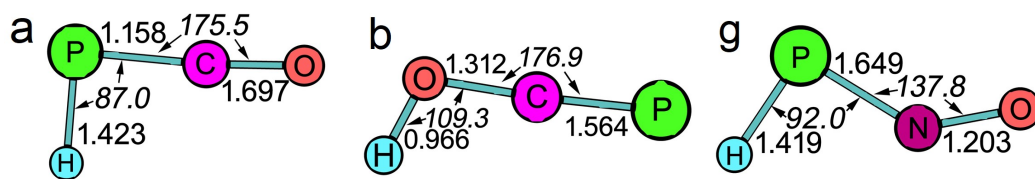

**Figure S12.** The CCSD(T)/cc-pVTZ computed bond lengths (Å) and angles (°).

**Table S1.** Observed and Calculated IR Frequencies ( $\text{cm}^{-1}$ ) for HPCO.

| $\nu_{\text{calc.}}^{[a]}$ |              | $\nu_{\text{obs.}}^{[b]}$ | $\Delta \nu(\text{H/D})$ |                      | assignment <sup>[c]</sup>                         |
|----------------------------|--------------|---------------------------|--------------------------|----------------------|---------------------------------------------------|
| harmonic                   | VPT2         |                           | obs. <sup>[d]</sup>      | calc. <sup>[e]</sup> |                                                   |
| 2390.9 (16)                | 2292.9 (17)  | 2311.9 (1.22)             | 634.7                    | 627.3                | $\nu_{1s}$ , $\nu(\text{PH})$                     |
| 2042.1 (631)               | 2011.0 (605) | 1998.5 (100)              | -1.1                     | -0.6                 | $\nu_{2s}$ , $\nu(\text{CO})$                     |
| 867.4 (11)                 | 851.1 (11)   | 857.9 (1.67)              | 118.5                    | 122.8                | $\nu_{3s}$ , $\delta(\text{HPC})$                 |
| 703.1 (5)                  | 686.2 (4)    | 698.4 (0.76)              | 40.7                     | 36.0                 | $\nu_{4s}$ , $\nu(\text{PC})$                     |
| 467.0 (<1)                 | 470.5 (<1)   | 473.4 <sup>[f]</sup>      | -1.6 <sup>[f]</sup>      | 5.6                  | $\nu_{5s}$ , $\delta_{\text{o.o.p.}}(\text{PCO})$ |
| 381.3 (7)                  | 386.6 (7)    | 392.6 <sup>[f]</sup>      | 47.9 <sup>[f]</sup>      | 43.6                 | $\nu_{6s}$ , $\delta_{\text{i.p.}}(\text{PCO})$   |

[a] Calculated frequencies and intensities ( $\text{km mol}^{-1}$ , in parenthesis) at the CCSD(T)/cc-pVTZ level.

[b] Observed frequencies and relative intensities (in parenthesis) in Ar-matrix. [c] Tentative

assignment of the vibrational modes. [d] Observed isotope shifts in the Ar-matrix. [e] VPT2

computed isotope shifts. [f] Derived from overtone bands.

**Table S2.** Calculated and Observed IR Frequencies (4000–500 cm<sup>-1</sup>) of HPCO and DPCO.

| HPCO                                |                                    | DPCO                                |                                    | assignment <sup>[c]</sup>                      |
|-------------------------------------|------------------------------------|-------------------------------------|------------------------------------|------------------------------------------------|
| $\nu_{\text{calc.}}$ <sup>[a]</sup> | $\nu_{\text{obs.}}$ <sup>[b]</sup> | $\nu_{\text{calc.}}$ <sup>[a]</sup> | $\nu_{\text{obs.}}$ <sup>[b]</sup> |                                                |
| 2292.9 (16.76)                      | 2311.8 (1.22)                      | 1665.6 (8.25)                       | 1677.1 (0.42)                      | $\nu_1$ , $\nu(\text{PH})$                     |
| 2011.0 (604.79)                     | 1998.5 (100)                       | 2011.6 (605.72)                     | 1999.6 (100)                       | $\nu_2$ , $\nu(\text{CO})$                     |
| 851.1 (10.66)                       | 857.9 (1.67)                       | 728.3 (1.96)                        | 739.4 (0.52)                       | $\nu_3$ , $\delta(\text{HPC})$                 |
| 686.2 (4.13)                        | 698.4 (0.76)                       | 650.2 (6.32)                        | 657.7 (1.61)                       | $\nu_4$ , $\nu(\text{PC})$                     |
| 470.5 (0.02)                        | 473.4 <sup>[d]</sup>               | 464.9 (0.07)                        | 471.8 <sup>[d]</sup>               | $\nu_5$ , $\delta_{\text{o.o.p.}}(\text{PCO})$ |
| 386.6 (6.92)                        | 392.6 <sup>[d]</sup>               | 343.0(6.04)                         | 344.7 <sup>[d]</sup>               | $\nu_6$ , $\delta_{\text{i.p.}}(\text{PCO})$   |
| 4302.6 (0.34)                       | n.o. <sup>[e]</sup>                | 3286.3 (0.02)                       | n.o. <sup>[e]</sup>                | $2\nu_1$                                       |
| 3998.9 (7.61)                       | 3972.0 (1.36)                      | 4000.1(7.60)                        | 3973.6 (3.83)                      | $2\nu_2$                                       |
| 1697.6 (0.87)                       | 1709.1 (0.27)                      | 1450.5 (0.31)                       | 1473.6 (0.06)                      | $2\nu_3$                                       |
| 1364.7 (0.37)                       | 1389.7 (0.05)                      | 1297.0 (0.06)                       | n.o. <sup>[e]</sup>                | $2\nu_4$                                       |
| 941.6 (0.48)                        | 946.8 (0.02)                       | 930.6 (0.42)                        | 943.6 (0.08)                       | $2\nu_5$                                       |
| 779.7 (0.86)                        | 785.2 (0.10)                       | 689.5 (1.35)                        | 689.4 (0.00)                       | $2\nu_6$                                       |
| 4302.6 (0.34)                       | n.o. <sup>[e]</sup>                | 3676.2(0.19)                        | 3674.8 (0.02)                      | $\nu_1 + \nu_2$                                |
| 3124.4 (0.05)                       | 3151.7 (0.02)                      | 2391.2 (0.07)                       | 2414.7 (0.01)                      | $\nu_1 + \nu_3$                                |
| 2977.8 (0.17)                       | 3009.2 (0.03)                      | 2309.3 (0.15)                       | 2311.7 (0.33)                      | $\nu_1 + \nu_4$                                |
| 2763.3 (0.01)                       | 2774.2 (0.03)                      | 2130.4 (0.00)                       | n.o. <sup>[e]</sup>                | $\nu_1 + \nu_5$                                |
| 2679.1 (0.12)                       | 2689.9 (0.01) <sup>[f]</sup>       | 2007.2 (0.32)                       | 2010.9 <sup>[g]</sup>              | $\nu_1 + \nu_6$                                |
| 2859.0 (0.11)                       | 2852.2 (0.03)                      | 2738.2 (2.71)                       | 2736.6 (0.82)                      | $\nu_2 + \nu_3$                                |
| 2696.0 (4.58)                       | 2694.8 (0.83)                      | 2658.6 (2.00)                       | 2652.9 (0.36)                      | $\nu_2 + \nu_4$                                |
| 2475.3 (0.04)                       | n.o. <sup>[e]</sup>                | 2470.3 (0.03)                       | n.o. <sup>[e]</sup>                | $\nu_2 + \nu_5$                                |
| 2393.0 (0.08)                       | 2383.5 (0.01)                      | 2352.5 (0.00)                       | n.o. <sup>[e]</sup>                | $\nu_2 + \nu_6$                                |
| 1535.4 (0.26)                       | 1554.2 (0.07)                      | 1376.2 (0.17)                       | 1389.6 (0.07)                      | $\nu_3 + \nu_4$                                |
| 1324.2 (0.02)                       | n.o. <sup>[e]</sup>                | 1191.5 (0.01)                       | n.o. <sup>[e]</sup>                | $\nu_3 + \nu_5$                                |
| 1236.4 (3.01)                       | 1246.4 (0.60)                      | 1073.7 (1.08)                       | 1091.2 (0.27)                      | $\nu_3 + \nu_6$                                |
| 1152.2 (0.00)                       | n.o. <sup>[e]</sup>                | 1115.2 (0.01)                       | n.o. <sup>[e]</sup>                | $\nu_4 + \nu_5$                                |
| 1062.8 (0.02)                       | 1082.2 (0.01)                      | 984.6 (1.01)                        | 1001.6 (0.30)                      | $\nu_4 + \nu_6$                                |
| 870.9 (0.00)                        | n.o. <sup>[e]</sup>                | 813.1 (0.00)                        | n.o. <sup>[e]</sup>                | $\nu_5 + \nu_6$                                |

[a] Computed anharmonic IR frequencies (cm<sup>-1</sup>) and intensities (km mol<sup>-1</sup>, in parentheses) at the CCSD(T)/cc-pVTZ level using VPT2. [b] Observed band positions (cm<sup>-1</sup>) and normalized relative intensities (in parentheses) in Ar-matrix at 12 K. [c] Tentative assignment of the vibrational modes according to the computed vibrational displacement vectors. [d] Derived from combination and overtone bands. [e] Not observed due to either out of range (4000–500 cm<sup>-1</sup>) or low intensity. [f] Overlap with the strong band at 2694.8 cm<sup>-1</sup>. [g] Overlap with the strong band at 1996.9 cm<sup>-1</sup>.

**Table S3.** Experimental and Calculated IR Frequencies ( $\text{cm}^{-1}$ ) for HP.

| $\nu_{\text{calc.}}^{[a]}$ | $\nu_{\text{obs.}}$ |                        | $\Delta \nu(\text{H/D})$ |                      | assignment <sup>[b]</sup> |
|----------------------------|---------------------|------------------------|--------------------------|----------------------|---------------------------|
|                            | Ar-matrix           | N <sub>2</sub> -matrix | obs. <sup>[c]</sup>      | calc. <sup>[d]</sup> |                           |
| 2264.4 (75)                | 2300.9              | 2291.3                 | 633.1                    | 620.0                | $\nu_1, \nu(\text{PH})$   |

[a] Calculated VPT2 anharmonic frequencies and intensities ( $\text{km mol}^{-1}$ , in parenthesis) at the UCCSD(T)/cc-pVTZ level. [b] Tentative assignment of the vibrational modes according to the computed vibrational displacement vectors. [c] Observed isotope shift in Ar-matrix. [d] VPT2 computed isotope shift.

**Table S4.** Observed and Calculated IR Frequencies ( $\text{cm}^{-1}$ ) for PCO•.

| $\nu_{\text{calc.}}^{[a]}$ | $\nu_{\text{obs.}}$ |           |                        | assignment <sup>[b]</sup>   |
|----------------------------|---------------------|-----------|------------------------|-----------------------------|
|                            | ref. <sup>[c]</sup> | Ar-matrix | N <sub>2</sub> -matrix |                             |
| 1921.2 (1189)              | 1912.7              | 1912.8    | 1919.3                 | $\nu_1, \nu(\text{CO})$     |
| 718.7 (9)                  | n.o.                | n.o.      | n.o.                   | $\nu_2, \nu(\text{CP})$     |
| 407.2 (9)                  | n.o.                | n.o.      | n.o.                   | $\nu_3, \delta(\text{PCO})$ |

[a] Calculated VCI (utilizing quartic force fields) anharmonic frequencies and intensities ( $\text{km mol}^{-1}$ , in parenthesis) at the UCCSD(T)-F12/cc-pVTZ-F12 level. [b] Tentative assignment of the vibrational modes according to the computed vibrational displacement vectors. [c] In Ar-matrix, see reference 6.

**Table S5.** Calculated IR Frequencies ( $\text{cm}^{-1}$ ) for *syn*-HPNO•.

| $\nu_{\text{calc.}}^{[a]}$ | $\Delta \nu_{\text{calc.}}(\text{H/D})$ | $\Delta \nu_{\text{calc.}}(^{14}\text{N}/^{15}\text{N})$ | assignment <sup>[b]</sup>   |
|----------------------------|-----------------------------------------|----------------------------------------------------------|-----------------------------|
| 2194.8 (74)                | 594.8                                   | 0.1                                                      | $\nu_1, \nu(\text{HP})$     |
| 1598.4 (241)               | -1.4                                    | 29.2                                                     | $\nu_2, \nu(\text{NO})$     |
| 905.9 (33)                 | 222.9                                   | 3.0                                                      | $\nu_3, \delta(\text{HP})$  |
| 721.4 (2)                  | -5.4                                    | 7.2                                                      | $\nu_4, \nu(\text{PN})$     |
| 503.9 (<1)                 | 59.9                                    | 6.6                                                      | $\nu_5, \tau(\text{HPN})$   |
| 291.8 (4)                  | 12.9                                    | 4.7                                                      | $\nu_6, \delta(\text{PNO})$ |

[a] VPT2 computed anharmonic frequencies and intensities ( $\text{km mol}^{-1}$ , in parenthesis) at the UCCSD(T)/cc-pVTZ level. [b] Tentative assignment of the vibrational modes according to the computed vibrational displacement vectors.

**Table S6.** Calculated and Observed IR Frequencies (4000–500 cm<sup>-1</sup>) for HOCP.

| $\nu_{\text{calc.}}$ <sup>[a]</sup> | $\nu_{\text{obs.}}$ <sup>[b]</sup> |                        | $\Delta \nu(\text{H/D})$ |                      | assignment <sup>[c]</sup>      |
|-------------------------------------|------------------------------------|------------------------|--------------------------|----------------------|--------------------------------|
|                                     | Ar-matrix                          | N <sub>2</sub> -matrix | obs. <sup>[d]</sup>      | calc. <sup>[e]</sup> |                                |
| 3599.0 (138)                        | 3549.6 (43)                        | 3514.8 (49)            | 924.2                    | 940.6                | $\nu_1$ , $\nu(\text{OH})$     |
| 1647.7 (274)                        | 1647.8 (100)                       | 1653.4 (100)           | 9.3                      | 10.0                 | $\nu_2$ , $\nu(\text{CP})$     |
| 1188.4 (173)                        | 1174.8 (55)                        | 1186.0 (44)            | 254.4                    | 261.9                | $\nu_3$ , $\delta(\text{COH})$ |
| 793.8 (5)                           | n.o.                               | n.o.                   | n.o.                     | 15.8                 | $\nu_4$ , $\nu(\text{CO})$     |
| 423.6 (7)                           | n.o.                               | n.o.                   | n.o.                     | 12.2                 | $\nu_5$ , $\tau(\text{CP})$    |
| 376.8 (22)                          | n.o.                               | n.o.                   | n.o.                     | 28.6                 | $\nu_6$ , $\delta(\text{OCP})$ |

[a] VPT2 computed anharmonic frequencies and intensities (km mol<sup>-1</sup>, in parenthesis) at the CCSD(T)/cc-pVTZ level. [b] Observed frequencies and relative intensities (in parenthesis). [c] Tentative assignment of the vibrational modes according to the computed vibrational displacement vectors. [d] Observed isotope shifts in the Ar-matrix. [e] VPT2 computed isotope shifts.



## Computed Atomic Coordinates (in Angstrom) and Energies (in Hartree) for All Optimized Structures

### HPCO

#### CCSD(T)/cc-pVTZ

|                           |              |                  |             |
|---------------------------|--------------|------------------|-------------|
| P                         | -1.100245047 | 0.048807065      | 0.000000000 |
| H                         | -1.090711152 | -1.373954481     | 0.000000000 |
| C                         | 0.595063156  | -0.027036592     | 0.000000000 |
| O                         | 1.752883159  | 0.012341826      | 0.000000000 |
| Electronic energy         | ...          | -454.64156814 Eh |             |
| Total thermal energy      |              | -454.62238243 Eh |             |
| Final Gibbs free enthalpy | ...          | -454.65076644 Eh |             |

### HOCP

#### CCSD(T)/cc-pVTZ

|                           |              |                  |              |
|---------------------------|--------------|------------------|--------------|
| O                         | -1.740823680 | -0.061696019     | -0.000061935 |
| H                         | -2.106797437 | 0.831972640      | -0.000085531 |
| C                         | -0.430008729 | 0.006372289      | 0.000166622  |
| P                         | 1.134111968  | 0.002320421      | -0.000029787 |
| Electronic energy         | ...          | -454.61202767 Eh |              |
| Total thermal energy      |              | -454.58962864 Eh |              |
| Final Gibbs free enthalpy | ...          | -454.61761738 Eh |              |

### HP

#### UCCSD(T)/cc-pVTZ

|                           |             |                  |              |
|---------------------------|-------------|------------------|--------------|
| P                         | 0.000000000 | 0.000000000      | 0.045028872  |
| H                         | 0.000000000 | 0.000000000      | -1.383884561 |
| Electronic energy         | ...         | -341.43243743 Eh |              |
| Total thermal energy      |             | -341.42471969 Eh |              |
| Final Gibbs free enthalpy | ...         | -341.44603401 Eh |              |

### CO

#### CCSD(T)/cc-pVTZ

|                           |             |                  |             |
|---------------------------|-------------|------------------|-------------|
| O                         | 0.000000000 | 0.000000000      | 0.057140293 |
| C                         | 0.000000000 | 0.000000000      | 1.192859706 |
| Electronic energy         | ...         | -113.15557882 Eh |             |
| Total thermal energy      |             | -113.14831307 Eh |             |
| Final Gibbs free enthalpy | ...         | -113.16980983 Eh |             |

### •OH

#### UCCSD(T)/cc-pVTZ

|                   |             |                 |             |
|-------------------|-------------|-----------------|-------------|
| O                 | 0.695488760 | -1.228722864    | 0.000000000 |
| H                 | 0.371339909 | -0.313354755    | 0.000000000 |
| Electronic energy | ...         | -75.63772341 Eh |             |

|                           |     |                 |
|---------------------------|-----|-----------------|
| Total thermal energy      |     | -75.62683265 Eh |
| Final Gibbs free enthalpy | ... | -75.64611268 Eh |

**CP•**

**UCCSD(T)/cc-pVTZ**

|                           |              |             |                  |
|---------------------------|--------------|-------------|------------------|
| C                         | -0.653083910 | 0.857418100 | 0.000000000      |
| P                         | 0.916614530  | 0.857418100 | 0.000000000      |
| Electronic energy         |              | ...         | -378.78325596 Eh |
| Total thermal energy      |              |             | -378.77800658 Eh |
| Final Gibbs free enthalpy |              | ...         | -378.80160969 Eh |

**anti-HPNO•**

**UCCSD(T)/cc-pVTZ**

|                           |              |              |                  |
|---------------------------|--------------|--------------|------------------|
| 15                        | -1.038126422 | 0.111786535  | 0.000000000      |
| 1                         | -1.484825179 | -1.235056968 | 0.000000000      |
| 7                         | 0.544302781  | -0.353112824 | 0.000000000      |
| 8                         | 1.627343016  | 0.170487738  | 0.000000000      |
| Electronic energy         |              | ...          | -471.19848650 Eh |
| Total thermal energy      |              |              | -471.17969340 Eh |
| Final Gibbs free enthalpy |              | ...          | -471.20880834 Eh |

**syn-HPNO•**

**UCCSD(T)/cc-pVTZ**

|                           |              |              |                  |
|---------------------------|--------------|--------------|------------------|
| P                         | -1.063708608 | -0.017849466 | 0.000000000      |
| H                         | -0.889245425 | -1.440578177 | 0.000000000      |
| N                         | 0.546334228  | 0.337811611  | 0.000000000      |
| O                         | 1.637576881  | -0.170409484 | 0.000000000      |
| Electronic energy         |              | ...          | -471.19466453 Eh |
| Total thermal energy      |              |              | -471.17627530 Eh |
| Final Gibbs free enthalpy |              | ...          | -471.20566272 Eh |

**Transition State between anti-HPNO• and syn-HPNO•**

**UCCSD(T)/cc-pVTZ**

|                           |              |              |                  |
|---------------------------|--------------|--------------|------------------|
| P                         | 1.079466172  | -0.092598085 | 0.000580892      |
| H                         | 1.317499597  | 1.331149001  | 0.000008963      |
| N                         | -0.523003292 | -0.015719276 | -0.001379523     |
| O                         | -1.722561477 | 0.022807360  | 0.000789667      |
| Electronic energy         |              | ...          | -471.17680516 Eh |
| Total thermal energy      |              |              | -471.15998894 Eh |
| Final Gibbs free enthalpy |              | ...          | -471.18884990 Eh |

**•NO**

**UCCSD(T)/cc-pVTZ**

|   |              |             |             |
|---|--------------|-------------|-------------|
| N | -0.444719623 | 0.857418100 | 0.000000000 |
|---|--------------|-------------|-------------|

|                           |             |             |                  |
|---------------------------|-------------|-------------|------------------|
| O                         | 0.708250243 | 0.857418100 | 0.000000000      |
| Electronic energy         |             | ...         | -129.71683452 Eh |
| Total thermal energy      |             |             | -129.70965925 Eh |
| Final Gibbs free enthalpy |             | ...         | -129.73201664 Eh |

### **HNCO**

#### **CCSD(T)/cc-pVTZ**

|                           |              |              |                  |
|---------------------------|--------------|--------------|------------------|
| N                         | -1.171115912 | -0.142141094 | 0.000024010      |
| H                         | -1.813621773 | 0.631516391  | 0.000075577      |
| C                         | 0.039215417  | 0.023101154  | -0.000083948     |
| O                         | 1.208968268  | 0.021270548  | 0.000026360      |
| Electronic energy         |              | ...          | -168.43278174 Eh |
| Total thermal energy      |              |              | -168.40832301 Eh |
| Final Gibbs free enthalpy |              | ...          | -168.43450920 Eh |

### **HCPO**

#### **CCSD(T)/cc-pVTZ**

|                           |              |              |                  |
|---------------------------|--------------|--------------|------------------|
| C                         | 1.518133822  | -0.284235130 | 0.000000000      |
| H                         | 2.445485779  | 0.267824417  | 0.000000000      |
| P                         | 0.000913866  | 0.195934792  | 0.000000000      |
| O                         | -1.436662468 | -0.182136079 | 0.000000000      |
| Electronic energy         |              | ...          | -454.56033210 Eh |
| Total thermal energy      |              |              | -454.54067364 Eh |
| Final Gibbs free enthalpy |              | ...          | -454.56915187 Eh |

### **HC(O)P**

#### **UCCSD(T)/cc-pVTZ**

|                           |              |              |                  |
|---------------------------|--------------|--------------|------------------|
| C                         | 0.000457206  | 0.781580643  | -0.000000010     |
| H                         | -0.782662110 | 1.563931260  | 0.000000003      |
| O                         | 1.178350141  | 1.074180219  | 0.000000003      |
| P                         | -0.579361237 | -0.994681123 | 0.000000002      |
| Electronic energy         |              | ...          | -454.57934304 Eh |
| Total thermal energy      |              |              | -454.55818747 Eh |
| Final Gibbs free enthalpy |              | ...          | -454.58797734 Eh |

### **HNCO**

#### **CCSD(T)/cc-pVTZ**

|                           |              |              |                  |
|---------------------------|--------------|--------------|------------------|
| N                         | -1.171115912 | -0.142141094 | 0.000024010      |
| H                         | -1.813621773 | 0.631516391  | 0.000075577      |
| C                         | 0.039215417  | 0.023101154  | -0.000083948     |
| O                         | 1.208968268  | 0.021270548  | 0.000026360      |
| Electronic energy         |              | ...          | -168.43278174 Eh |
| Total thermal energy      |              |              | -168.40832301 Eh |
| Final Gibbs free enthalpy |              | ...          | -168.43450920 Eh |

**HOCN****CCSD(T)/cc-pVTZ**

|                      |              |                  |              |
|----------------------|--------------|------------------|--------------|
| O                    | -0.143197172 | -1.124264726     | -0.000000000 |
| H                    | 0.732552710  | -1.530925334     | -0.000000000 |
| C                    | -0.003116049 | 0.175951619      | 0.000000000  |
| N                    | 0.057698510  | 1.339341442      | -0.000000000 |
| Electronic energy    | ...          | -168.39491798 Eh |              |
| Total thermal energy |              | -168.37014483 Eh |              |
| Total Enthalpy       | ...          | -168.36920062 Eh |              |

**HONC****CCSD(T)/cc-pVTZ**

|                      |              |                  |              |
|----------------------|--------------|------------------|--------------|
| O                    | -0.025775253 | -1.103505582     | -0.000000000 |
| H                    | -0.969430144 | -1.317130319     | -0.000000000 |
| C                    | 0.189909632  | 1.401261104      | -0.000000000 |
| N                    | 0.008377765  | 0.234011796      | 0.000000000  |
| Electronic energy    | ...          | -168.30115974 Eh |              |
| Total thermal energy |              | -168.27714809 Eh |              |
| Total Enthalpy       | ...          | -168.27620388 Eh |              |

**HCNO****CCSD(T)/cc-pVTZ**

|                           |              |                  |              |
|---------------------------|--------------|------------------|--------------|
| C                         | -0.049835343 | -1.181202165     | -0.000000023 |
| H                         | -0.073360528 | -2.241518724     | 0.000000015  |
| O                         | 0.046590201  | 1.188114095      | 0.000000007  |
| N                         | 0.000231671  | -0.016294204     | -0.000000000 |
| Electronic energy         | ...          | -168.32119851 Eh |              |
| Total thermal energy      |              | -168.29954789 Eh |              |
| Final Gibbs free enthalpy | ...          | -168.32224866 Eh |              |

**HC(O)N****UCCSD(T)/cc-pVTZ**

|                      |              |                  |              |
|----------------------|--------------|------------------|--------------|
| C                    | -0.008730904 | 0.384329647      | -0.000000006 |
| H                    | 0.031804281  | 1.484125745      | 0.000000002  |
| O                    | -1.058648635 | -0.244859578     | 0.000000002  |
| N                    | 1.217379258  | -0.261461814     | 0.000000001  |
| Electronic energy    | ...          | -168.29852456 Eh |              |
| Total thermal energy |              | -168.27635840 Eh |              |
| Total Enthalpy       | ...          | -168.27541419 Eh |              |

## References

- [1] E. D. Glendening, J. K. Badenhoop, A. E. Reed, J. E. Carpenter, J. A. Bohmann, C. M. Morales, P. Karafiloglou, C. R. Landis and F. Weinhold, Theoretical Chemistry Institute, University of Wisconsin, Madison, WI (2018).
- [2] F. Neese, *WIREs Comput. Mol. Sci.*, 2018, **8**, No. e1327.
- [3] T. Lu and F. W. Chen, *J. Comput. Chem.*, 2012, **33**, 580–592.
- [4] M. J. Frisch, G. W. Trucks, H. B. Schlegel, G. E. Scuseria, M. A. Robb, J. R. Cheeseman, G. Scalmani, V. Barone, B. Mennucci, G. A. Petersson, H. Nakatsuji, M. Caricato, X. Li, H. P. Hratchian, A. F. Izmaylov, J. Bloino, G. Zheng, J. L. Sonnenberg, M. Hada, M. Ehara, K. Toyota, R. Fukuda, J. Hasegawa, M. Ishida, T. Nakajima, Y. Honda, O. Kitao, H. Nakai, T. Vreven, J. A. Montgomery, Jr., J. E. Peralta, F. Ogliaro, M. Bearpark, J. J. Heyd, E. Brothers, K. N. Kudin, V. N. Staroverov, R. Kobayashi, J. Normand, K. Raghavachari, A. Rendell, J. C. Burant, S. S. Iyengar, J. Tomasi, M. Cossi, N. Rega, J. M. Millam, M. Klene, J. E. Knox, J. B. Cross, V. Bakken, C. Adamo, J. Jaramillo, R. Gomperts, R. E. Stratmann, O. Yazyev, A. J. Austin, R. Cammi, C. Pomelli, J. W. Ochterski, R. L. Martin, K. Morokuma, V. G. Zakrzewski, G. A. Voth, P. Salvador, J. J. Dannenberg, S. Dapprich, A. D. Daniels, Ö. Farkas, J. B. Foresman, J. V. Ortiz, J. Cioslowski, D. J. Fox, *Gaussian 09*, Revision A.2, Gaussian, Inc., Wallingford CT, 2009.
- [5] a) K. Fukui, *Acc. Chem. Res.*, 1981, **14**, 363368. b) J. A. Montgomery Jr. and M. J. Frisch, *J. Chem. Phys.*, 1999, **110**, 2822.
- [6] Z. Mielke and L. Andrews, *Chem. Phys. Lett.*, 1991, **181**, 355.
